# Supplementary material for: Stool DNA test targeting methylated syndecan-2 (SDC2) as a noninvasive screening method for colorectal cancer
Source: Oxford University Press journal article supplement (doi:10.1042/bsr20201930), 2021-01-01

Supplementary Table S1.

The basis of Ct 39 cutoff for methylated SDC2 is suggested based on the calculations in the following table. The cutoff is selected to balance the overall sensitivity and specificity.

| Cutoff CT value | False positive | False Negative | True positive | True Negative | Sensitivity       | Specificity       | Accuracy          |
|-----------------|----------------|----------------|---------------|---------------|-------------------|-------------------|-------------------|
| 38              | 6              | 18             | 44            | 70            | 0.709677419354839 | 0.921052631578947 | 0.826086956521739 |
| 38.5            | 8              | 15             | 47            | 68            | 0.758064516129032 | 0.894736842105263 | 0.833333333333333 |
| 39              | 9              | 14             | 48            | 67            | 0.774193548387097 | 0.881578947368421 | 0.833333333333333 |
| 39.5            | 10             | 13             | 49            | 66            | 0.790322580645161 | 0.868421052631579 | 0.833333333333333 |
| 40              | 12             | 12             | 50            | 64            | 0.806451612903226 | 0.842105263157895 | 0.826086956521739 |
| 40.5            | 12             | 12             | 50            | 64            | 0.806451612903226 | 0.842105263157895 | 0.826086956521739 |
| 41              | 12             | 10             | 52            | 64            | 0.838709677419355 | 0.842105263157895 | 0.840579710144927 |

**Supplementary figure 1.** The Methylation levels of SDC2 measured in the stools of healthy participants versus CRC patients

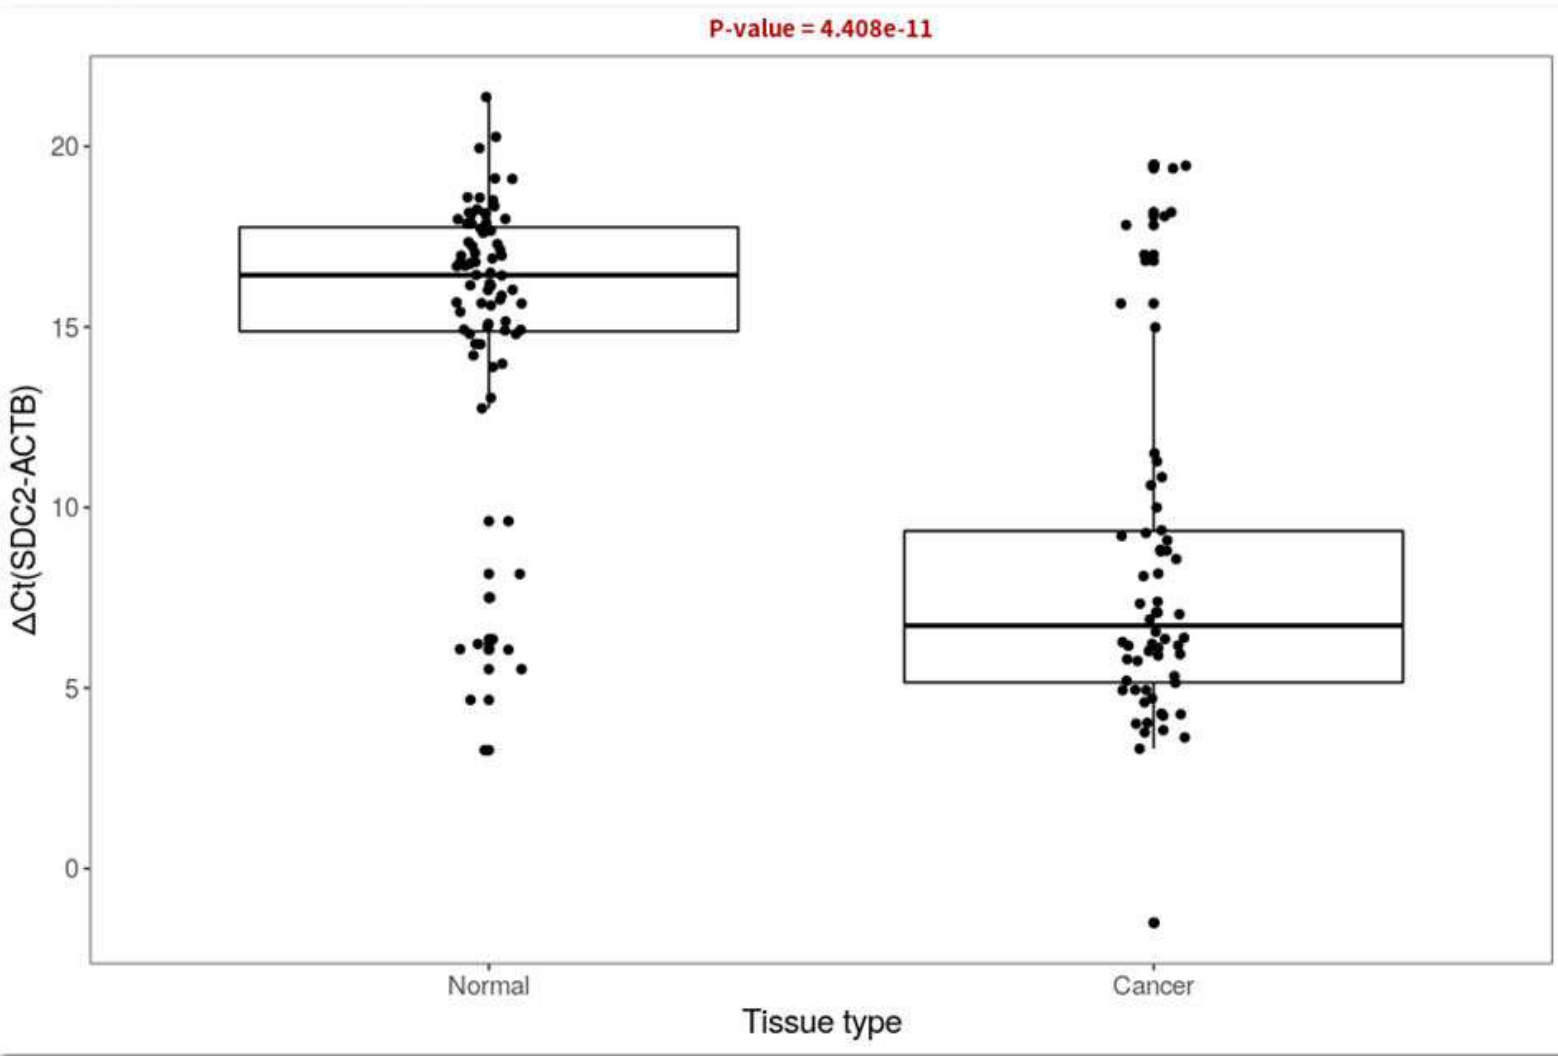

Supplement: bsr-2020-1930_supp.pdf [file bsr-2020-1930_supp.pdf]
